# Supplementary material for: Potential Benefits of Epidermal Growth Factor for Inhibiting Muscle Degrative Markers in Rats with Alcoholic Liver Damage
Source: MDPI journal article supplement (doi:10.3390/ijms24108845), 2023-05-16
Supplement: s1 [file s1]

**Supplementary Table S1.** Effects of EGF on plasma amino acid composition in rats fed with ethanol for 6 weeks<sup>1,2</sup>.

| Groups <sup>3</sup> | C       |   |        |    | E      |   |        |    | AEGF-C  |   |        |     | PEGF-E  |   |        |    | AEGF-E  |   |         |    |
|---------------------|---------|---|--------|----|--------|---|--------|----|---------|---|--------|-----|---------|---|--------|----|---------|---|---------|----|
| Valine (μM)         | 183.35  | ± | 14.67  | b  | 187.35 | ± | 13.16  | b  | 209.49  | ± | 42.07  | ab  | 218.64  | ± | 27.95  | ab | 289.39  | ± | 100.42  | a  |
| Leucine (μM)        | 224.82  | ± | 90.45  | b  | 288.38 | ± | 33.13  | ab | 404.42  | ± | 122.26 | ab  | 295.91  | ± | 14.84  | ab | 528.42  | ± | 283.28  | a  |
| Isoleucine (μM)     | 270.09  | ± | 46.63  | b  | 297.87 | ± | 16.06  | b  | 336.90  | ± | 86.47  | ab  | 319.95  | ± | 6.76   | ab | 425.19  | ± | 90.49   | a  |
| BCAA (μM)           | 678.25  | ± | 144.45 | b  | 773.61 | ± | 58.00  | b  | 950.81  | ± | 187.97 | ab  | 834.50  | ± | 25.88  | b  | 1243.01 | ± | 395.92  | a  |
| Tyrosine (μM)       | 164.89  | ± | 10.54  | ab | 146.51 | ± | 3.90   | b  | 219.08  | ± | 119.07 | ab  | 152.80  | ± | 12.42  | ab | 308.06  | ± | 136.91  | a  |
| Tryptophan (μM)     | 24.58   | ± | 2.35   |    | 21.91  | ± | 1.79   |    | 28.41   | ± | 5.36   |     | 22.53   | ± | 0.99   |    | 24.15   | ± | 12.08   |    |
| Phenylalanine (μM)  | 183.34  | ± | 33.71  | b  | 166.91 | ± | 17.33  | b  | 161.05  | ± | 10.13  | b   | 208.66  | ± | 51.00  | ab | 365.14  | ± | 191.85  | a  |
| AAA (μM)            | 372.80  | ± | 34.40  |    | 335.33 | ± | 19.60  |    | 408.55  | ± | 118.88 |     | 383.99  | ± | 40.09  |    | 397.35  | ± | 301.45  |    |
| Threonine (μM)      | 0.00    | ± | 0.00   |    | 0.05   | ± | 0.09   |    | 0.07    | ± | 0.13   |     | 0.11    | ± | 0.14   |    | 0.00    | ± | 0.00    |    |
| Serine (nM)         | 0.00    | ± | 0.00   |    | 0.00   | ± | 0.00   |    | 0.00    | ± | 0.00   |     | 0.00    | ± | 0.00   |    | 0.00    | ± | 0.00    |    |
| Proline (μM)        | 26.24   | ± | 2.48   | c  | 30.95  | ± | 2.07   | bc | 33.52   | ± | 0.54   | abc | 37.77   | ± | 0.89   | ab | 41.92   | ± | 9.98    | ab |
| Lysine (μM)         | 3.31    | ± | 2.20   |    | 3.01   | ± | 2.11   |    | 4.11    | ± | 1.86   |     | 0.51    | ± | 1.16   |    | 4.86    | ± | 2.96    |    |
| Glycine (μM)        | 0.00    | ± | 0.00   |    | 0.00   | ± | 0.00   |    | 0.00    | ± | 0.00   |     | 0.00    | ± | 0.00   |    | 0.00    | ± | 0.00    |    |
| Glutamine (μM)      | 7.58    | ± | 0.33   | a  | 6.47   | ± | 0.33   | ab | 7.03    | ± | 1.06   | a   | 3.21    | ± | 2.27   | b  | 6.17    | ± | 3.52    | ab |
| Glutamic acid (μM)  | 2.39    | ± | 0.63   |    | 1.80   | ± | 0.34   |    | 2.07    | ± | 0.28   |     | 2.43    | ± | 0.92   |    | 2.67    | ± | 0.51    |    |
| Aspartic acid (μM)  | 0.10    | ± | 0.18   |    | 0.22   | ± | 0.21   |    | 0.00    | ± | 0.00   |     | 0.08    | ± | 0.13   |    | 0.21    | ± | 0.31    |    |
| Asparagine (nM)     | 0.00    | ± | 0.00   |    | 0.00   | ± | 0.00   |    | 0.00    | ± | 0.00   |     | 0.00    | ± | 0.00   |    | 0.00    | ± | 0.00    |    |
| Arginine (nM)       | 3041.50 | ± | 365.10 |    | 828.70 | ± | 619.70 |    | 2051.20 | ± | 406.20 |     | 1373.50 | ± | 548.70 |    | 2807.10 | ± | 2879.20 |    |
| Cysteine (μM)       | 0.00    | ± | 0.00   |    | 0.00   | ± | 0.00   |    | 0.00    | ± | 0.00   |     | 0.00    | ± | 0.00   |    | 0.00    | ± | 0.00    |    |
| Histidine (μM)      | 0.00    | ± | 0.00   |    | 0.00   | ± | 0.00   |    | 0.00    | ± | 0.00   |     | 0.00    | ± | 0.00   |    | 0.00    | ± | 0.00    |    |
| Alanine (μM)        | 0.01    | ± | 0.01   |    | 0.00   | ± | 0.00   |    | 0.01    | ± | 0.01   |     | 0.01    | ± | 0.02   |    | 0.02    | ± | 0.03    |    |
| Methionine (μM)     | 9.87    | ± | 4.46   |    | 6.41   | ± | 2.54   |    | 7.53    | ± | 4.64   |     | 14.17   | ± | 5.18   |    | 53.57   | ± | 66.53   |    |

<sup>1</sup>Values are presented as means ± SDs (n = 6).<sup>2</sup>Values with the same letter in a column are not significantly different, as determined using a one-way analysis of variance followed by Duncan's multiple range test,  $p < 0.05$ .<sup>3</sup>The C group was fed a control liquid diet for eight weeks; the E group was fed a control liquid diet for two weeks and then an ethanol-containing diet for six weeks; the AEGF-C group was fed an EGF-containing control liquid diet for eight weeks; the PEGF-E group was fed an EGF-containing control liquid diet for two weeks and then an ethanol-containing liquid diet for six weeks; and the AEGF-E group was fed an EGF-containing control liquid diet for two weeks and then an EGF-containing ethanol liquid diet for six weeks.

**Supplementary Table S2.** Effects of EGF on hepatic amino acid composition in rats fed with ethanol for 6 weeks<sup>1,2</sup>.

| Groups <sup>3</sup> | C       |   |                   | E       |   |                     | AEGF-C  |   |                     | PEGF-E  |   |                     | AEGF-E  |   |                     |
|---------------------|---------|---|-------------------|---------|---|---------------------|---------|---|---------------------|---------|---|---------------------|---------|---|---------------------|
| Valine (μM)         | 490.03  | ± | 214.99            | 424.14  | ± | 225.77              | 351.74  | ± | 177.48 <sup>0</sup> | 392.44  | ± | 253.15              | 439.65  | ± | 223.30              |
| Leucine (μM)        | 632.26  | ± | 89.21             | 576.81  | ± | 198.43              | 559.64  | ± | 136.09              | 531.40  | ± | 177.04              | 531.07  | ± | 113.29              |
| Isoleucine (μM)     | 588.94  | ± | 164.20            | 477.11  | ± | 240.74              | 396.96  | ± | 142.53              | 479.96  | ± | 229.34              | 571.62  | ± | 333.51              |
| BCAA (μM)           | 1755.82 | ± | 350.20            | 1478.06 | ± | 59.28               | 1308.35 | ± | 325.96              | 1403.80 | ± | 588.77              | 1542.34 | ± | 655.31              |
| Tyrosine (μM)       | 443.92  | ± | 76.76             | 462.33  | ± | 83.51               | 363.80  | ± | 135.55              | 451.53  | ± | 92.47               | 392.98  | ± | 143.15              |
| Tryptophan (μM)     | 14.09   | ± | 5.70              | 14.55   | ± | 8.78                | 10.22   | ± | 3.66                | 13.69   | ± | 5.99                | 11.46   | ± | 4.27                |
| Phenylalanine (μM)  | 577.35  | ± | 28.78             | 537.32  | ± | 56.85               | 489.20  | ± | 116.38              | 495.32  | ± | 139.12              | 505.22  | ± | 143.80              |
| AAA (μM)            | 1035.37 | ± | 108.68            | 1014.21 | ± | 147.22              | 863.22  | ± | 254.66              | 960.54  | ± | 229.55              | 909.67  | ± | 290.76              |
| Threonine (μM)      | 58.31   | ± | 51.86             | 20.28   | ± | 5.98                | 15.95   | ± | 5.26                | 16.99   | ± | 4.71                | 21.45   | ± | 14.29               |
| Serine (nM)         | 0.00    | ± | 0.00              | 0.00    | ± | 0.00                | 0.00    | ± | 0.00                | 66.53   | ± | 115.24              | 0.00    | ± | 0.00                |
| Proline (μM)        | 116.97  | ± | 28.89             | 173.84  | ± | 119.83              | 184.45  | ± | 110.30              | 120.33  | ± | 63.23               | 164.06  | ± | 93.27               |
| Lysine (μM)         | 20.09   | ± | 3.93 <sup>b</sup> | 38.13   | ± | 8.77 <sup>a</sup>   | 24.34   | ± | 2.44 <sup>ab</sup>  | 25.32   | ± | 14.76 <sup>ab</sup> | 17.36   | ± | 7.28 <sup>b</sup>   |
| Glycine (μM)        | 0.00    | ± | 0.00              | 0.00    | ± | 0.00                | 0.00    | ± | 0.00                | 0.00    | ± | 0.00                | 0.00    | ± | 0.00                |
| Glutamine (μM)      | 40.82   | ± | 3.57              | 40.90   | ± | 8.00                | 39.95   | ± | 5.95                | 33.74   | ± | 11.72               | 51.89   | ± | 14.79               |
| Glutamic acid (μM)  | 39.15   | ± | 17.68             | 35.61   | ± | 4.62                | 32.75   | ± | 2.83                | 37.20   | ± | 12.80               | 28.62   | ± | 4.94                |
| Aspartic acid (μM)  | 62.70   | ± | 38.29             | 53.72   | ± | 13.58               | 44.90   | ± | 40.94               | 57.51   | ± | 55.72               | 67.58   | ± | 58.55               |
| Asparagine (nM)     | 0.00    | ± | 0.00 <sup>b</sup> | 0.00    | ± | 0.00 <sup>b</sup>   | 0.00    | ± | 0.00 <sup>b</sup>   | 41.67   | ± | 72.17 <sup>b</sup>  | 196.80  | ± | 171.99 <sup>a</sup> |
| Arginine (nM)       | 942.27  | ± | 247.77            | 984.87  | ± | 232.71              | 886.10  | ± | 433.91              | 754.37  | ± | 170.50              | 662.80  | ± | 191.48              |
| Cysteine (μM)       | 0.00    | ± | 0.00              | 0.00    | ± | 0.00                | 0.00    | ± | 0.00                | 0.00    | ± | 0.00                | 0.00    | ± | 0.00                |
| Histidine (μM)      | 26.48   | ± | 8.68 <sup>a</sup> | 22.14   | ± | 19.17 <sup>ab</sup> | 18.47   | ± | 10.81 <sup>ab</sup> | 5.79    | ± | 5.80 <sup>ab</sup>  | 2.12    | ± | 0.69 <sup>b</sup>   |
| Alanine (μM)        | 2.70    | ± | 0.70              | 3.82    | ± | 2.98                | 4.06    | ± | 1.45                | 2.49    | ± | 0.50                | 3.10    | ± | 1.39                |
| Methionine (μM)     | 80.64   | ± | 39.38             | 115.96  | ± | 129.33              | 101.09  | ± | 99.33               | 96.44   | ± | 111.17              | 97.64   | ± | 86.36               |

<sup>1</sup>Values are presented as means ± SDs (n = 6).<sup>2</sup>Values with the same letter in a column are not significantly different, as determined using a one-way analysis of variance followed by Duncan's multiple range test,  $p < 0.05$ .<sup>3</sup>The C group was fed a control liquid diet for eight weeks; the E group was fed a control liquid diet for two weeks and then an ethanol-containing diet for six weeks; the AEGF-C group was fed an EGF-containing control liquid diet for eight weeks; the PEGF-E group was fed an EGF-containing control liquid diet for two weeks and then an ethanol-containing liquid diet for six weeks; and the AEGF-E group was fed an EGF-containing control liquid diet for two weeks and then an EGF-containing ethanol liquid diet for six weeks.

**Supplementary Table S3.** Effects of EGF on muscular amino acid composition in rats fed with ethanol for 6 weeks<sup>1,2</sup>.

| Groups <sup>3</sup> | C       |   |        |    | E       |   |        |    | AEGF-C  |   |        |    | PEGF-E  |   |         |    | AEGF-E  |   |         |    |
|---------------------|---------|---|--------|----|---------|---|--------|----|---------|---|--------|----|---------|---|---------|----|---------|---|---------|----|
| Valine (μM)         | 154.69  | ± | 4.11   | bc | 113.16  | ± | 48.67  | c  | 231.77  | ± | 74.14  | ab | 201.33  | ± | 31.56   | a  | 271.41  | ± | 79.05   | a  |
| Leucine (μM)        | 209.87  | ± | 83.99  | c  | 377.11  | ± | 49.84  | b  | 328.05  | ± | 50.97  | b  | 353.59  | ± | 29.65   | b  | 561.46  | ± | 66.38   | a  |
| Isoleucine (μM)     | 263.08  | ± | 65.46  |    | 234.22  | ± | 53.05  |    | 243.06  | ± | 91.01  |    | 249.04  | ± | 53.21   |    | 308.63  | ± | 37.90   |    |
| BCAA (μM)           | 627.64  | ± | 127.74 | b  | 724.49  | ± | 33.00  | b  | 802.88  | ± | 109.99 | b  | 803.96  | ± | 73.46   | b  | 1141.50 | ± | 148.68  | a  |
| Tyrosine (μM)       | 268.32  | ± | 48.21  |    | 183.93  | ± | 74.07  |    | 225.18  | ± | 147.94 |    | 180.26  | ± | 58.40   |    | 296.17  | ± | 76.26   |    |
| Tryptophan (μM)     | 9.25    | ± | 2.26   | ab | 7.00    | ± | 1.91   | b  | 10.88   | ± | 0.93   | a  | 10.87   | ± | 2.03    | a  | 11.50   | ± | 1.97    | a  |
| Phenylalanine (μM)  | 246.68  | ± | 29.82  |    | 283.91  | ± | 78.33  |    | 325.84  | ± | 14.43  |    | 393.71  | ± | 136.77  |    | 352.07  | ± | 115.00  |    |
| AAA (μM)            | 524.25  | ± | 45.16  |    | 474.85  | ± | 17.95  |    | 561.90  | ± | 159.53 |    | 584.84  | ± | 81.73   |    | 459.75  | ± | 70.23   |    |
| Threonine (μM)      | 0.99    | ± | 1.72   |    | 1.66    | ± | 2.58   |    | 0.00    | ± | 0.00   |    | 0.00    | ± | 0.00    |    | 0.04    | ± | 0.07    |    |
| Serine (nM)         | 0.00    | ± | 0.00   |    | 0.00    | ± | 0.00   |    | 0.00    | ± | 0.00   |    | 0.00    | ± | 0.00    |    | 0.00    | ± | 0.00    |    |
| Proline (μM)        | 27.76   | ± | 4.90   |    | 26.49   | ± | 6.60   |    | 32.08   | ± | 10.27  |    | 21.14   | ± | 3.96    |    | 27.98   | ± | 8.18    |    |
| Lysine (μM)         | 8.00    | ± | 1.29   | ab | 12.02   | ± | 5.00   | ab | 7.66    | ± | 1.40   | b  | 6.41    | ± | 2.42    | b  | 7.06    | ± | 1.77    | b  |
| Glycine (μM)        | 0.00    | ± | 0.00   |    | 0.00    | ± | 0.00   |    | 0.00    | ± | 0.00   |    | 0.00    | ± | 0.00    |    | 0.00    | ± | 0.00    |    |
| Glutamine (μM)      | 16.77   | ± | 3.08   | a  | 13.76   | ± | 3.81   | ab | 10.27   | ± | 0.66   | ab | 7.92    | ± | 1.01    | b  | 14.34   | ± | 8.61    | ab |
| Glutamic acid (μM)  | 24.20   | ± | 11.68  |    | 18.53   | ± | 5.31   |    | 16.01   | ± | 8.36   |    | 21.26   | ± | 11.50   |    | 25.99   | ± | 17.70   |    |
| Aspartic acid (μM)  | 0.33    | ± | 0.12   |    | 3.90    | ± | 3.79   |    | 1.53    | ± | 1.39   |    | 1.78    | ± | 1.49    |    | 3.46    | ± | 3.31    |    |
| Asparagine (nM)     | 93.87   | ± | 162.58 |    | 38.57   | ± | 48.34  |    | 30.30   | ± | 52.48  |    | 0.00    | ± | 0.00    |    | 0.00    | ± | 0.00    |    |
| Arginine (nM)       | 1279.60 | ± | 304.52 | b  | 3069.67 | ± | 629.23 | a  | 1924.27 | ± | 150.23 | ab | 2114.97 | ± | 1099.07 | ab | 2600.50 | ± | 1176.68 | ab |
| Cysteine (μM)       | 0.00    | ± | 0.00   |    | 0.00    | ± | 0.00   |    | 0.00    | ± | 0.00   |    | 0.00    | ± | 0.00    |    | 0.00    | ± | 0.00    |    |
| Histidine (μM)      | 1.15    | ± | 0.37   | b  | 11.53   | ± | 5.68   | a  | 8.62    | ± | 7.67   | ab | 4.48    | ± | 5.97    | ab | 3.42    | ± | 3.90    | ab |
| Alanine (μM)        | 1.72    | ± | 0.47   |    | 3.81    | ± | 3.73   |    | 4.38    | ± | 5.11   |    | 1.45    | ± | 0.39    |    | 1.64    | ± | 0.16    |    |
| Methionine (μM)     | 28.78   | ± | 1.70   | bc | 22.77   | ± | 4.95   | c  | 36.79   | ± | 9.10   | ab | 33.39   | ± | 3.49    | ab | 41.91   | ± | 2.03    | a  |

<sup>1</sup>Values are presented as means ± SDs (n = 6).<sup>2</sup>Values with the same letter in a column are not significantly different, as determined using a one-way analysis of variance followed by Duncan's multiple range test,  $p < 0.05$ .<sup>3</sup>The C group was fed a control liquid diet for eight weeks; the E group was fed a control liquid diet for two weeks and then an ethanol-containing diet for six weeks; the AEGF-C group was fed an EGF-containing control liquid diet for eight weeks; the PEGF-E group was fed an EGF-containing control liquid diet for two weeks and then an ethanol-containing liquid diet for six weeks; and the AEGF-E group was fed an EGF-containing control liquid diet for two weeks and then an EGF-containing ethanol liquid diet for six weeks.

**Supplementary Table S4. Experimental diet composition<sup>1</sup>**

| Ingredient <sup>2</sup>         | Control         | EGF <sup>3</sup> | Ethanol | Ethanol + EGF |
|---------------------------------|-----------------|------------------|---------|---------------|
|                                 | g/L (1000 kcal) |                  |         |               |
| Casein                          | 41.4            | 41.4             | 41.4    | 41.4          |
| L-Cysteine                      | 0.5             | 0.5              | 0.5     | 0.5           |
| DL-Methionine                   | 0.3             | 0.3              | 0.3     | 0.3           |
| Corn Oil                        | 8.5             | 8.5              | 8.5     | 8.5           |
| Olive Oil                       | 28.4            | 28.4             | 28.4    | 28.4          |
| Safflower Oil                   | 2.7             | 2.7              | 2.7     | 2.7           |
| Choline bitartrate              | 0.53            | 0.53             | 0.53    | 0.53          |
| Fiber                           | 10              | 10               | 10      | 10            |
| Xanthan gum                     | 3               | 3                | 3       | 3             |
| AIN-76 Vitamins                 | 2.5             | 2.5              | 2.5     | 2.5           |
| AIN-76 Minerals                 | 2.6             | 2.6              | 2.6     | 2.6           |
| Maltodextrin                    | 115.2           | 115.2            | 25.6    | 25.6          |
| Ethanol                         | -               | -                | 50      | 50            |
| EGF <sup>3</sup> (μg/kg BW/day) | -               | 30               | -       | 30            |

<sup>1</sup>The C group was fed a control liquid diet for eight weeks; the E group was fed a control liquid diet for two weeks and then an ethanol-containing diet for six weeks; the AEGF-C group was fed an EGF-containing control liquid diet for eight weeks; the PEGF-E group was fed an EGF-containing control liquid diet for two weeks and then an ethanol liquid diet for six weeks; and the AEGF-E group was fed an EGF-containing control liquid diet for two weeks and then an EGF-containing ethanol liquid diet for six weeks.

<sup>2</sup>Casein, AIN-76 vitamins, AIN-76 minerals, L-cysteine, DL-methionine, choline bitartrate, fiber, and maltodextrin were purchased from MP Biomedicals (Irvine, CA, USA). Ethanol was obtained from Sigma-Aldrich (St. Louis, MO, USA). Corn oil was obtained from God Bene Enterprise (Yunlin, Taiwan). Olive oil was obtained from Standard Foods Corporation (Taipei, Taiwan). Safflower oil was purchased from Taiwan Sugar Corporation (Taipei, Taiwan). <sup>3</sup>EGF was purchased from PeproTech (Cranbury, NJ, USA).

**Supplementary Table S5. Antibodies for analyzing related proteins.**

| Sample           | Antibody                       | Source                                    |
|------------------|--------------------------------|-------------------------------------------|
| Liver            | Mouse monoclonal TLR4          | Santa Cruz Biotechnology, Dallas, TX, USA |
|                  | Mouse monoclonal MyD88         | Proteintech Group, Rosemont, IL, USA      |
|                  | Rabbit polyclonal TRIF         | Abcam, Cambridge, UK                      |
| Intestine        | Rabbit polyclonal Claudin-1    | Affinity Bioscience, Cincinnati, OH, USA  |
|                  | Rabbit polyclonal Occludin     | Affinity Bioscience, Cincinnati, OH, USA  |
| Muscle           | Rabbit polyclonal 70S6K        | Affinity Bioscience, Cincinnati, OH, USA  |
|                  | Rabbit polyclonal p-70S6K-T389 | ABclonal Technology, Woburn, MA, USA      |
|                  | Rabbit polyclonal Myostatin    | Proteintech Group, Rosemont, IL, USA      |
| Internal control | Mouse monoclonal GAPDH         | Millipore, Burlington, MA, USA            |
|                  | Mouse monoclonal β-actin       | Santa Cruz Biotechnology, Dallas, TX, USA |

TLR4, Toll-like receptor 4; Myd88: myeloid differentiation primary response 88, TRIF: TIR-domain-containing adapter-inducing interferon-β; 70S6K, 70 ribosomal protein S6 kinase; GAPDH, glyceraldehyde 3-phosphate dehydrogenase.

**Supplementary Table S6. List of primer sequences for analyzing mRNA.**

|         | Forward 5'→3'        | Reverse 5'→3'            |
|---------|----------------------|--------------------------|
| FOXO    | TCAAGGATAAGGGCGACAGC | GTTCCCTTCATTCTGCACTCGAAT |
| MURF    | TAGAAGCTTCCAAGGGCTGC | GTGTCCCTCTGTGGACACG      |
| Atrogin | CTTCTCGACTGCCATCCTGG | CTCTGGACCAGCGTGCATAA     |
| GAPDH   | AGTGCCAGCCTCGTCTCATA | GATGGTGATGGGTTTCCCGT     |

Akt, protein kinase B; mTOR, mammalian target of rapamycin; LC3B, microtubule-associated proteins 1A/1B light chain 3B; FOXO, forkhead box protein O1; MuRF-1, muscle ring-finger protein-1; S6K, ribosomal protein S6 kinase; 4EBP1, eukaryotic translation initiation factor 4E (eIF4E)-binding protein 1; GAPDH, glyceraldehyde 3-phosphate dehydrogenase.

**Supplementary Table S7.** Chemicals and kits used in this study.

| Items                        | Chemical/Kit                                                   | Source                                                           | Catalog/CAS no.         |
|------------------------------|----------------------------------------------------------------|------------------------------------------------------------------|-------------------------|
| Diet-related products        | Casein                                                         | MP Biomedical, Santa Ana, CA, USA                                | 0290129325              |
|                              | L-Cystine                                                      | MP Biomedical, Santa Ana, CA, USA                                | 0210145490              |
|                              | DL-Methionine                                                  | MP Biomedical, Santa Ana, CA, USA                                | 190955 / 59-51-8        |
|                              | Choline Bitartrate                                             | MP Biomedical, Santa Ana, CA, USA                                | 0210138490              |
|                              | Alphacel non-nutritive (Fiber)                                 | MP Biomedical, Santa Ana, CA, USA                                | 0290045325              |
|                              | Xanthan gum                                                    | CP Kelco US Inc., Okmulgee, OK, USA                              | KELTROL 521-XANTHAN GUN |
|                              | ICN: AIN-76 Vitamins                                           | MP Biomedical, Santa Ana, CA, USA                                | 0290545401              |
|                              | ICN: AIN-76 Minerals                                           | MP Biomedical, Santa Ana, CA, USA                                | 0290545502              |
|                              | Dextrinized corn starch                                        | MP Biomedical, Santa Ana, CA, USA                                | 0296042925              |
|                              | Ethanol (99.8%)                                                | Honeywell Research Chemicals, Charlotte, NC, USA                 | 32221-2.5L / 64-17-5    |
| Chemicals used in this study | NaCl                                                           | Honeywell Research Chemicals, Charlotte, NC, USA                 | 31434S / 7647-14-5      |
|                              | Tris-HCl                                                       | J. T. Baker, Radnor, PA, USA                                     | 4103-01 / 1185-53-1     |
|                              | Sodium dodecylsulfate (SDS)                                    | Sigma-Aldrich, St. Louis, MO, USA                                | L5750 / 151-21-3        |
|                              | Nonyl phenoxypolyethoxyethanol (NP-40)                         | Cayman Chemical, MI, USA                                         | 700024                  |
|                              | Chloroform                                                     | Riedel-de Haën, Honeywell Research Chemicals, Charlotte, NC, USA | 32211 / 67-66-3         |
|                              | Isopropanol                                                    | J. T. Baker, Radnor, PA, USA                                     | 9084-01 / 67-63-0       |
|                              | Polyethylene glycol mono-p-isooctylphenyl ether (Triton X-100) | Nacalai tesque, INC., Kyoto, Japan                               | 282-29 / 9002-93-1      |
|                              | Tris-Base                                                      | Bioman scientific Co., LTD., New Taipei City, Taiwan             | TRS011.1                |
|                              | Glycine                                                        | Bioman scientific Co., LTD., New Taipei City, Taiwan             | GLN011.1                |
|                              | 30% Acrylamide                                                 | Bio-rad, Hercules, CA, USA                                       | 1610158                 |
|                              | TEMED                                                          | Sigma-Aldrich, St. Louis, MO, USA                                | T7024 / 110-18-9        |
|                              | Ammonium persulfate                                            | Sigma-Aldrich, St. Louis, MO, USA                                | A3678 / 7727-54-0       |
|                              | Methanol                                                       | ECHO Chemical, Miaoli County, Taiwan                             | MA1101                  |
|                              | Tween 20                                                       | Sigma-Aldrich, St. Louis, MO, USA                                | P-7949 / 9005-64-5      |
|                              | 10% Formaldehyde solution                                      | Macron fine chemicals, Radnor, PA, USA                           | H121-08                 |
|                              | Acetonitrile                                                   | J. T. Baker, Radnor, PA, USA                                     | 9017-03 / 75-05-8       |
|                              | Formic acid                                                    | Nacalai tesque, INC., Kyoto, Japan                               | 163-11 / 64-18-6        |
|                              | TRI Reagent®                                                   | Sigma-Aldrich, St. Louis, MO, USA                                | T9424                   |
|                              | 2X RIPA Buffer                                                 | BioBasic INC., Amherst, NY, USA                                  | RB4475                  |

|                          | Proteinase inhibitor cocktail                       | MedChemExpress, Monmouth Junction, NJ, USA           | HY-K0010   |
|--------------------------|-----------------------------------------------------|------------------------------------------------------|------------|
|                          | Phosphatase inhibitor cocktail tablets              | Roche, Basel, Switzerland                            | 4906837001 |
| ELISA kits               | IL-1 $\beta$                                        | R&D Systems, Minneapolis, MN, USA                    | dy501      |
|                          | IL-6                                                | R&D Systems, Minneapolis, MN, USA                    | dy506      |
|                          | IL-10                                               | R&D Systems, Minneapolis, MN, USA                    | dy522      |
|                          | TNF- $\alpha$                                       | R&D Systems, Minneapolis, MN, USA                    | dy510      |
| Colorimetric assay kits  | Thiobarbituric acid reactive substance (TBARS)      | Cayman Chemical, MI, USA                             | 10009055   |
|                          | Triglyceride                                        | Cayman Chemical, MI, USA                             | 10010303   |
|                          | Cholesterol                                         | Cell Biolabs, San Diego, CA, USA                     | STA-384    |
| PCR related kits         | RevertAid First Strand cDNA Synthesis kit           | ThermoFisher Scientific, Waltham, MA, USA            | K1621      |
|                          | SYBR Green/ROX qPCR Master Mix                      | ThermoFisher Scientific, Waltham, MA, USA            | K0222      |
| Western blot-related kit | 4X SDS Loading Dye                                  | Bioman Scientific Co., LTD., New Taipei City, Taiwan | P1001      |
|                          | Prestained Protein Ladder                           | Bioman Scientific Co., LTD., New Taipei City, Taiwan | Prep1025   |
|                          | Prestained Protein Ladder                           | Bioman scientific Co., LTD., New Taipei City, Taiwan | Prep1025G  |
|                          | T-Pro LumiLong Plus Chemiluminescence Detection Kit | T-Pro Biotechnology, New Taipei City, Taiwan         | JT96-K004M |
| Sample                   | Antibody                                            | Source                                               | Catalog    |
| Liver                    | Mouse monoclonal TLR4                               | Santa Cruz Biotechnology, Dallas, TX, USA            | A0620      |
|                          | Mouse monoclonal MyD88                              | Proteintech Group, Rosemont, IL, USA                 | 66660-1-1g |
|                          | Rabbit polyclonal TRIF                              | Abcam, Cambridge, UK                                 | Ab13810    |
| Intestine                | Rabbit Polyclonal Claudin-1                         | Affinity Bioscience, Cincinnati, OH, USA             | AF0127     |
|                          | Rabbit Polyclonal Occludin                          | Affinity Bioscience, Cincinnati, OH, USA             | DF7504     |
| Muscle                   | Rabbit polyclonal Myostatin                         | ABclonal Technology, Woburn, MA, USA                 | A6913      |
|                          | Rabbit polyclonal S6K                               | Affinity Bioscience, Cincinnati, OH, USA             | AF6226     |
|                          | Rabbit polyclonal p-S6K-T389                        | ABclonal Technology, Woburn, MA, USA                 | AP0564     |
|                          | Rabbit monoclonal p62                               | Cell Signaling, Danvers, MA, USA                     | 5114       |
|                          | Rabbit monoclonal Beclin1                           | Genetex, Irvine, CA, USA                             | GTX133555  |
|                          | Rabbit monoclonal MuRF-1                            | Proteintech Group, Rosemont, IL, USA                 | 55456-1-AP |
|                          | Rabbit polyclonal SMAD2/3                           | ABclonal Technology, Woburn, MA, USA                 | A7536      |
| Internal control         | Mouse monoclonal GAPDH                              | Proteintech Group, Rosemont, IL, USA                 | HRP-60004  |
|                          | Mouse monoclonal $\beta$ -actin                     | Proteintech Group, Rosemont, IL, USA                 | 66009-1-Ig |

|                       |                                         |                                   |             |
|-----------------------|-----------------------------------------|-----------------------------------|-------------|
| Secondary<br>antibody | Goat anti-Rabbit IgG (H+L)              | Croyez. Taipei, Taiwan            | C04003      |
|                       | HRP                                     |                                   |             |
|                       | Peroxidase-conjugated                   | Jackson ImmunoResearch INC., West | 115-035-033 |
|                       | Affinipure Goat anti-Mouse<br>IgG (H+L) | Grove, PA, USA                    |             |
